# Supplementary figures and images for: Mitochondrial Function Differences between Tumor Tissue of Human Metastatic and Premetastatic CRC
Source: MDPI journal article supplement (doi:10.3390/biology11020293), 2022-02-11

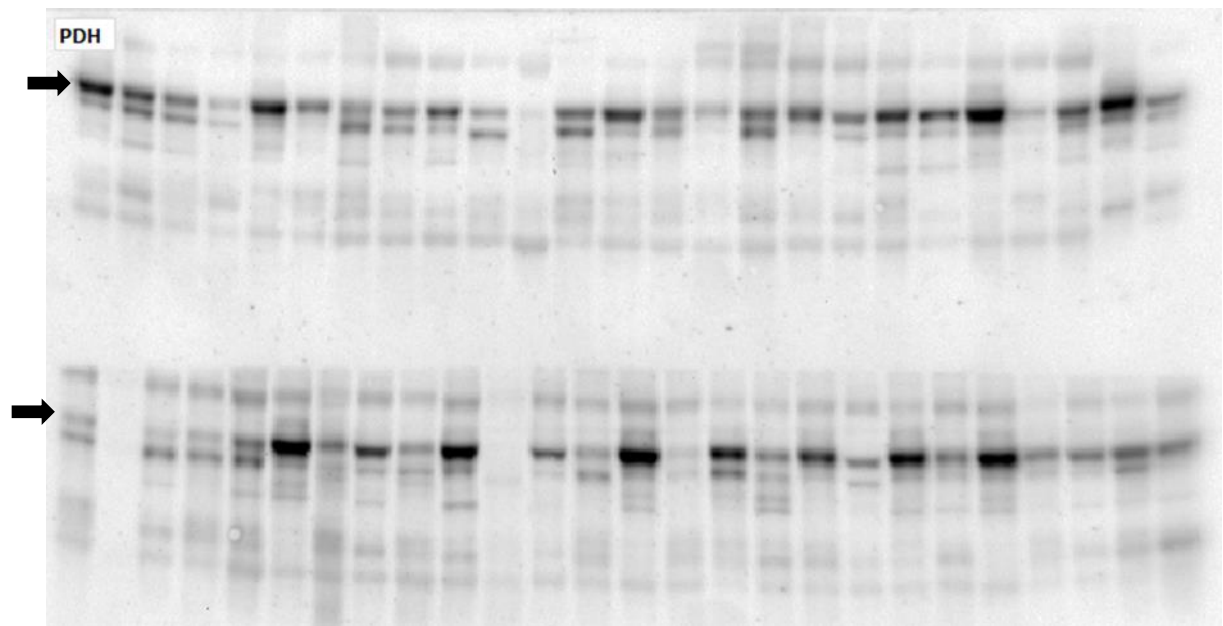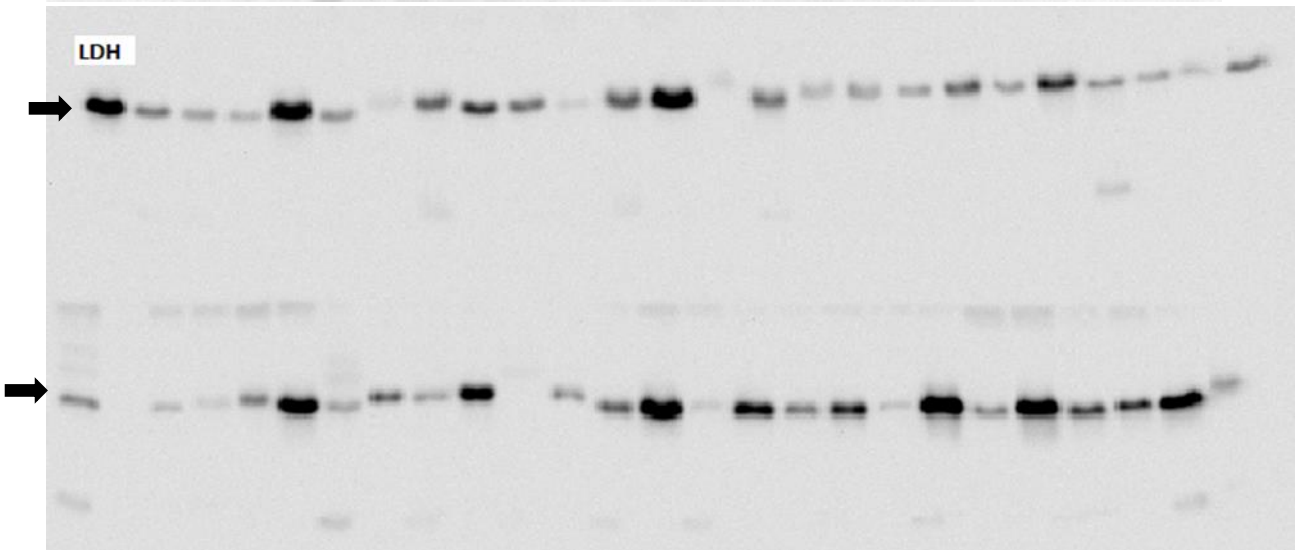

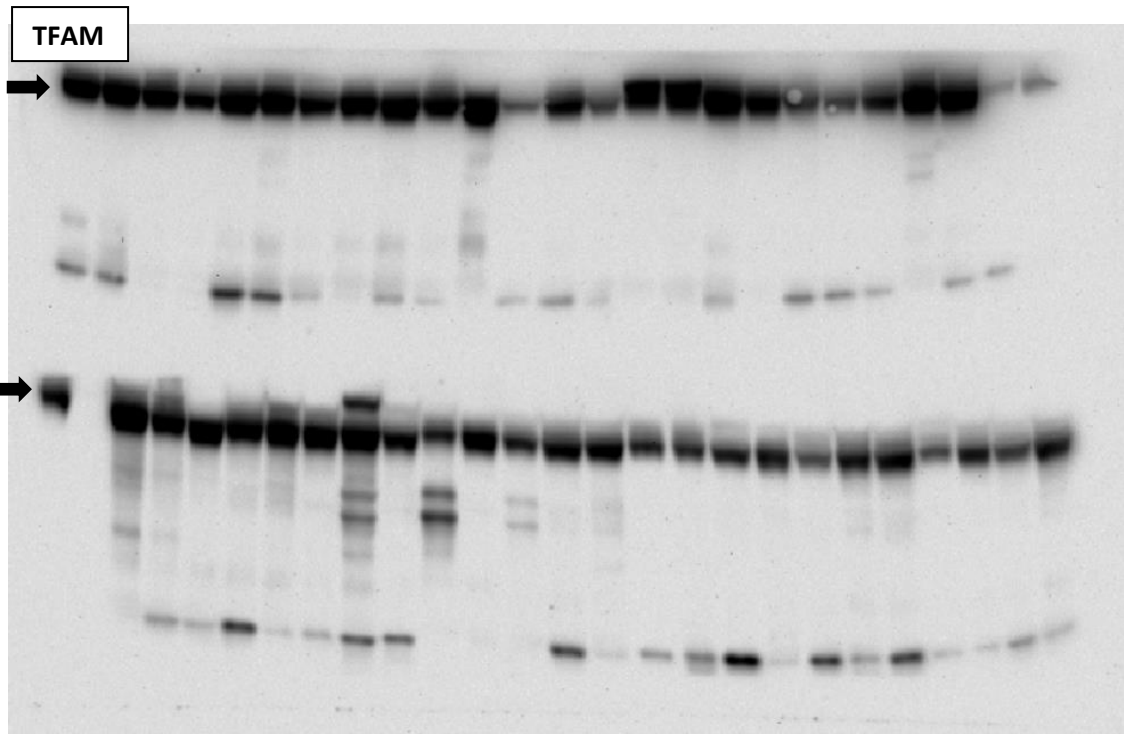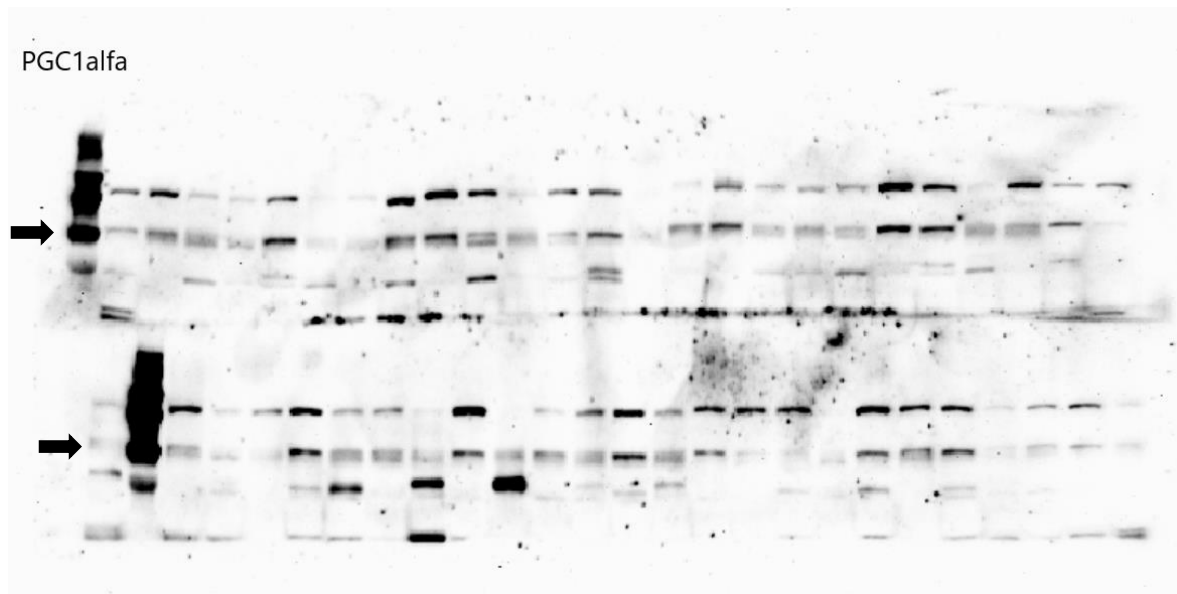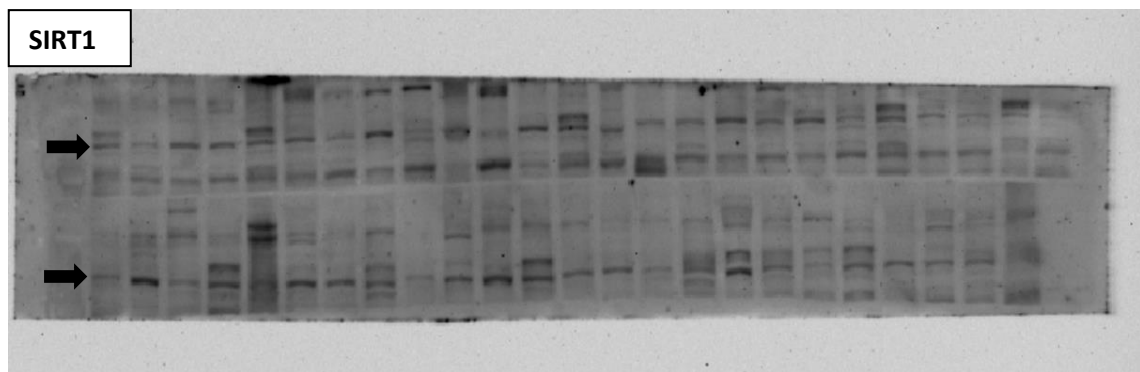

IDH2

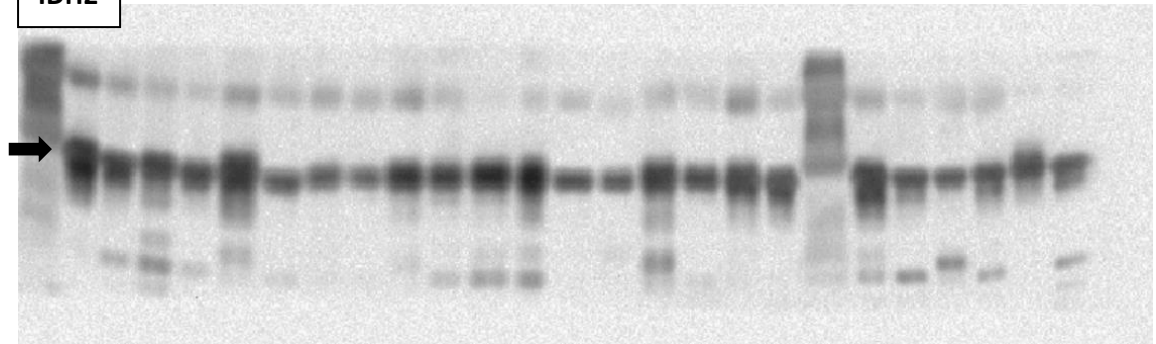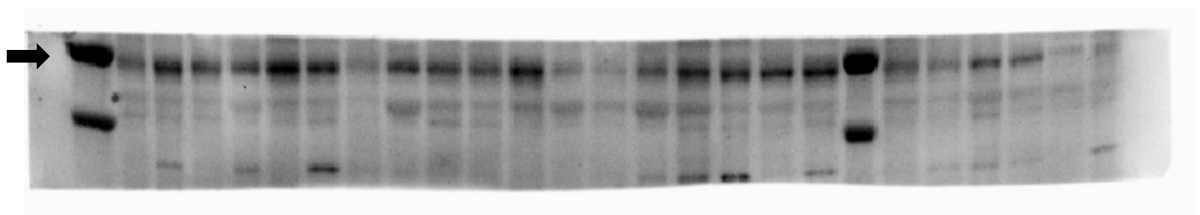

OXPHOS

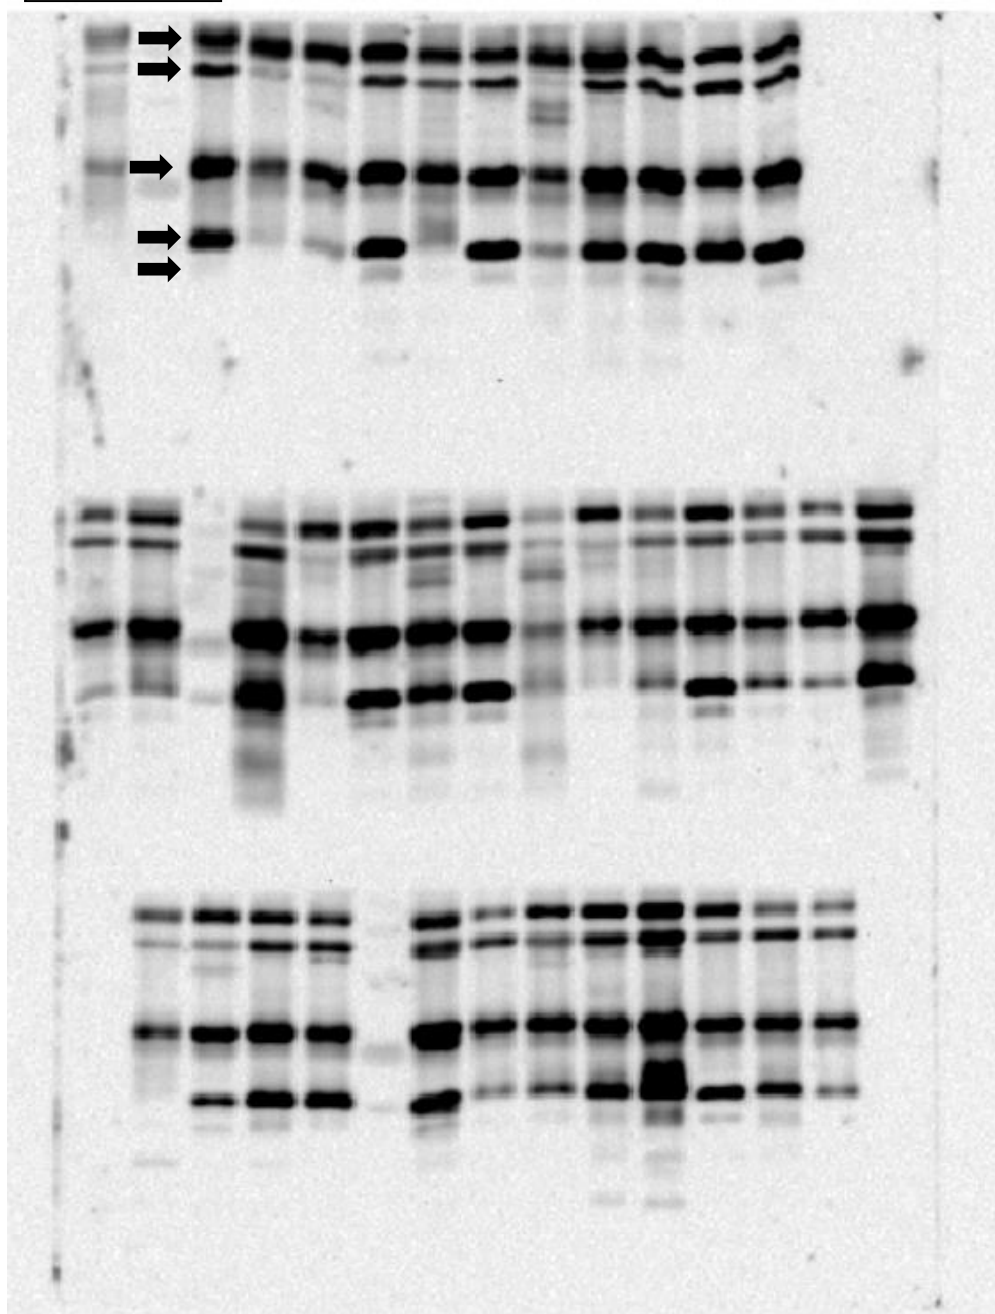

Supplement: s1 [file s1]
